# Supplementary material for: Muscular Function: An alternative way to identify cognitive impairment, Secondary Analysis From SABE-Colombia
Source: Research Square preprint supplement (doi:10.21203/rs.3.rs-131443/v1), 2020-12-23
Supplement: Supplementary file 2 [file 6bf1cdab325dc0589b4b8c94.xlsx]

## Sheet: Hoja1
Table 1. Descriptive analysis by cognitive status
		Cognitive normal	Cognitive impaired	P value
		n (%)
Gender	Female	2325(57.62)	855(62.78)	0.001
Comorbidities	Hypertension	2184(54.21)	843(62.17)	0.001
	Myocardial infraction	550 (13.64)	228(16.79)	0.004
	Stroke	149(3.7)	89(6.55)	0.001
	Diabetes	657(16.34)	240(17.69)	0.251
	Artropaties*	1170(29.05)	343(25.33)	0.008
	Mental Diseases**	326(8.10)	159(11.76)	0.001
	Mean ( SD)
	Age (years)	68 (10)	75 (14)	0.001
	Schooling (Years)	4 (4)	1 (3)	0.001
Muscular function	Hand Grip Strenght (kg) $	23.18 (8.84)	18.74( 8.7)	0.001
	Gait speed (m/s) $	0.723 (0.23)	0.586 (0.23)	0.001
Functionality	Lawton total	0 (2)	4 (10)	0.001
	Barthel Index	100 (0)	100 (5)	0.001
* include Arthrosis, Arthritis and Rheumatoid Arthritis; ** major mental disorders ; $ mean (SD) t-Test
	Table 2. Association between motor function and cognitive domains.
	Measure		Mini Mental State Examination
			Orientation			Recall			Counting			Language			Total
			R2	p value		R2	p value		R2	p value		R2	p value		R2	p value
	Gait speed		0.17	< 0.001		0.15	< 0.001		0.08	< 0.001		0.16	< 0.001		0.19	< 0.001
	Handgrip Strength		0.19	< 0.001		0.15	< 0.001		0.09	< 0.001		0.18	< 0.001		0.21	< 0.001
	* Both measures presented significat interaction with age
						Table 3. Association´s model for cognitive variables.
						Measure		Mini Mental State Examination
								Orientation		Recall		Counting		Language		Total
								R2		R2		R2		R2		R2
								0.291*		0.193*		0.109*		0.273*		0.303*
								β (SE)		β (SE)		β (SE)		β (SE)		β (SE)
						Gait speed		0.66 (0.16)		0.29 (0.07)		0.33 (0.11)		0.46 (0.13)		1.73 (0.38)
						Handgrip Strength		-0.14 (0.03)		-0.04 (0.02)		-0.04 (0.02)		-0.09 (0.3)		-0.3 (0.09)
						Age		0.15 (0.09)		0.07 (0.04)		0.14 (0.05)		0.06 (0.07)		0.43 (0.21)
						Mental disease		-0.16 (0.12)		-0.16 (0.05)		-0.03 (0.08)		-0.14 (0.09)		-0.44 (0.28)
						Barthel		0.19 (0.07)		0.08 (0.03)		0.14 (0.05)		0.1 (0.05)		0.51 (0.16)
						Lawton		0.3 (0.08)		0.09 (0.04)		-0.03 (0.06)		0.11 (0.07)		0.48 (0.19)
						Handgrip Strength : age °		0.002 (0.001)		0.001 (0.010)		0.001 (0.001)		0.001 (0.001)		0.005 (0.001)
						Barthel : age °		-0.002 (0.001)		-0.001 (0.001)		-0.001 (0.001)		-0.001 (0.001)		-0.007 (0.002)
						Lawton : age °		-0.008 (0.001)		-0.002 (0.001)		-0.001 (0.001)		-0.004 (0.001)		-0.015 (0.003)
						* p value < 0,001; ° Interaction; β: Beta coeficient; SE: standard error
